# Supplementary material for: Metabolomics Analysis of Different Quinoa Cultivars Based on UPLC-ZenoTOF-MS/MS and Investigation into Their Antioxidant Characteristics
Source: MDPI journal article supplement (doi:10.3390/plants13020240), 2024-01-15
Supplement: s1 [file s1]

*Supplementary Material for*

# **Metabolomics Analysis of Different Quinoa Cultivars Based on UPLC-ZenoTOF-MS/MS and Investigation into Their Antioxidant Characteristics**

**Shufang Wang <sup>1,2</sup>, Guannan Liu <sup>1</sup>, Chong Xie <sup>1</sup>, You Zhou <sup>2</sup>, Runqiang Yang <sup>1</sup>, Jirong Wu <sup>2</sup>, Jianhong Xu <sup>1,2,\*</sup> and Kang Tu <sup>1,\*</sup>**

<sup>1</sup> College of Food Science and Technology, Whole Grain Food Engineering Research Center, Nanjing Agricultural University, Nanjing 210095, China; wangshufang202301@163.com (S.W.); 2022208029@stu.njau.edu.cn (G.L.); xiechong@njau.edu.cn (C.X.); yangrq@njau.edu.cn (R.Y.)

<sup>2</sup> Jiangsu Key Laboratory for Food Quality and Safety-State Key Laboratory Cultivation Base, Ministry of Science and Technology/Key Laboratory for Control Technology and Standard for Agro-Product Safety and Quality, Ministry of Agriculture and Rural Affairs/Key Laboratory for Agro-Product Safety Risk Evaluation (Nanjing), Ministry of Agriculture and Rural Affairs/Collaborative Innovation Center for Modern Grain Circulation and Safety/Institute of Food Safety and Nutrition, Jiangsu Academy of Agricultural Sciences, Nanjing 210014, China; zhoyouox@163.com (Y.Z.); yangzhouwj@126.com (J.W.)

\* Correspondence: xjh@jaas.ac.cn (J.X.); kangtu@njau.edu.cn (K.T.); Tel.: +86-025-84392001 (J.X.); Fax: +86-025-84399016 (K.T.)

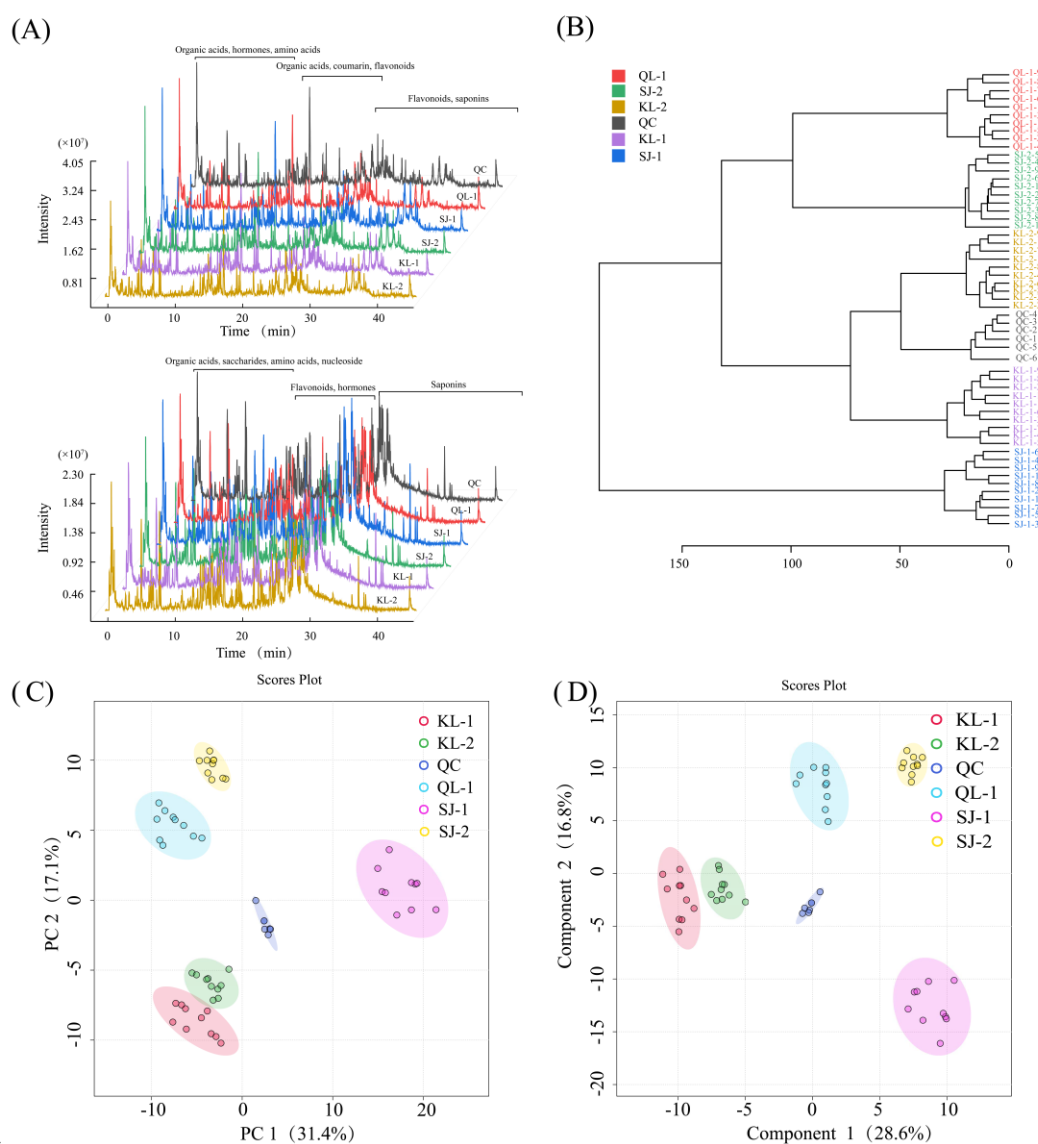

**Figure S1.** Isolation and identification of metabolites in different cultivars of quinoa. Total ion chromatogram of metabolite molecular species from different cultivars of quinoa under positive (Upper one) and negative (Lower one) ion mode (A). Hierarchical cluster dendritic diagram from different cultivars of quinoa under positive and negative ion mode (B). PCA score plot (C) and PLS-DA score plot (D) of identified metabolites in different cultivars of quinoa.

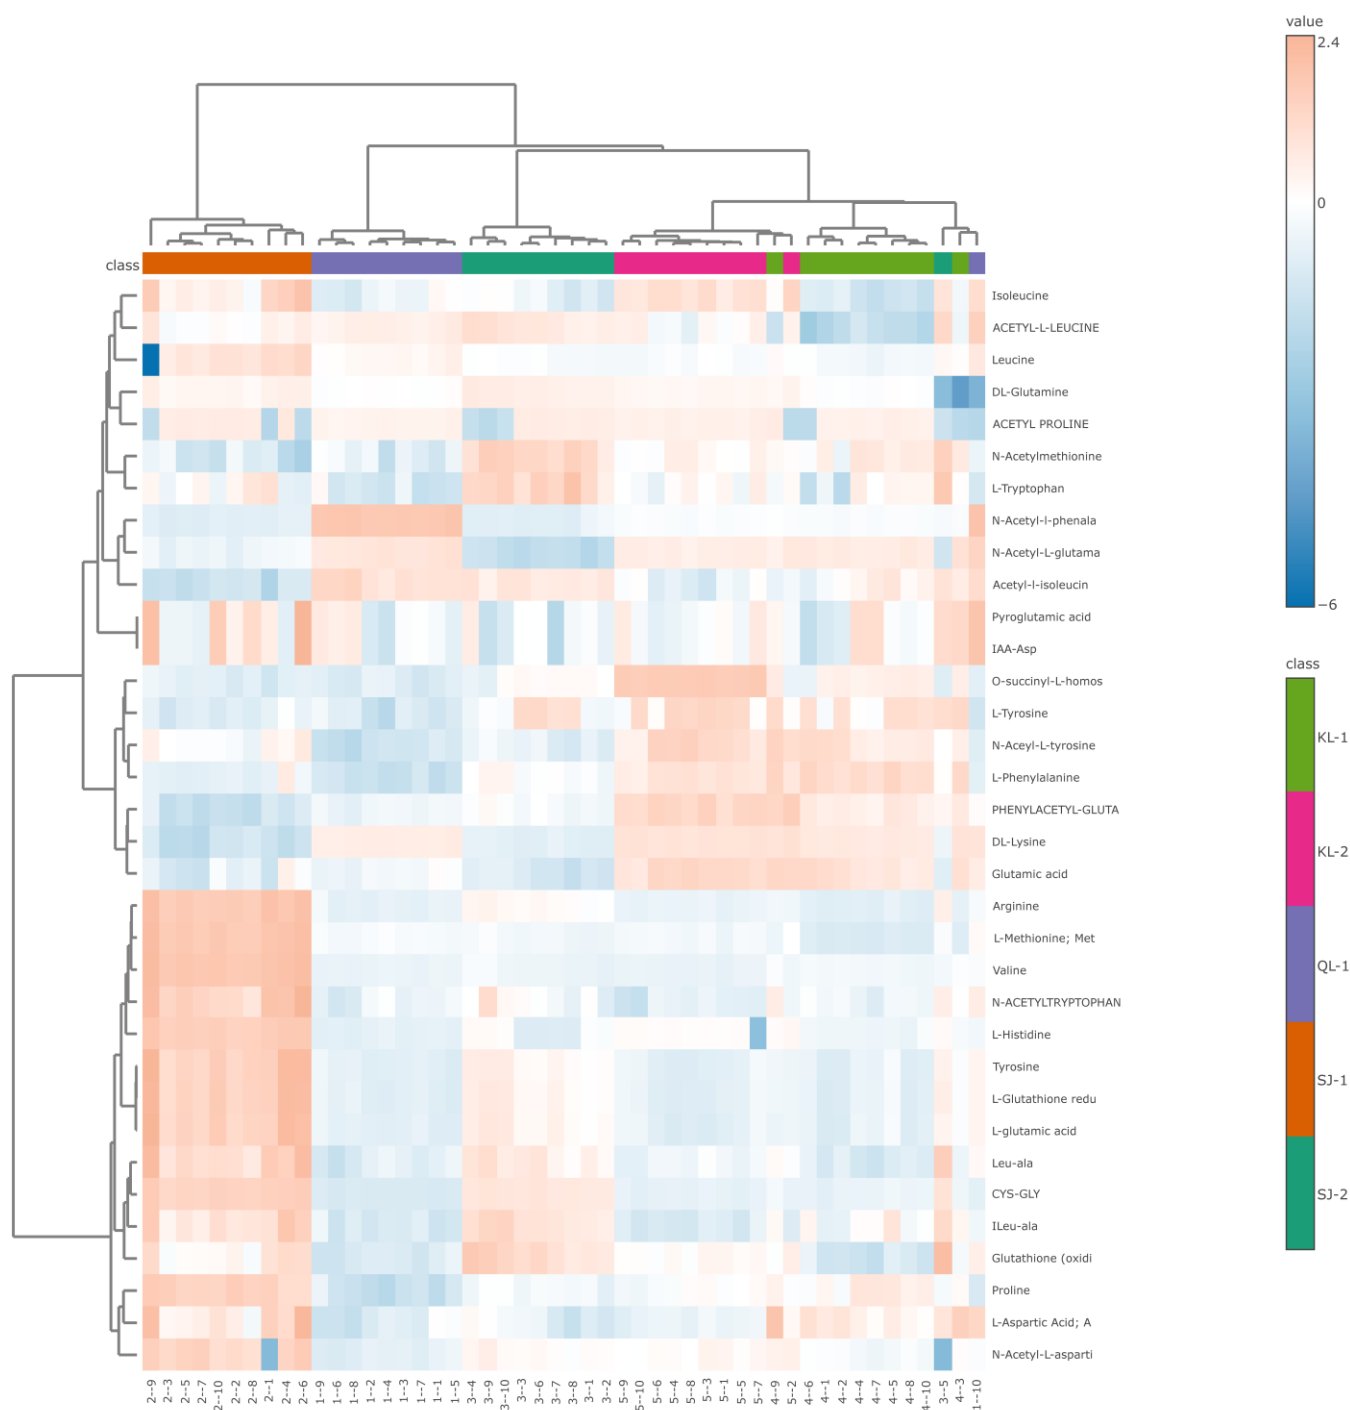

**Fig S2** Heatmaps based on top 25 amino acids/peptides in different varieties of quinoa. Colors represent different concentrations indicated by the color bar.

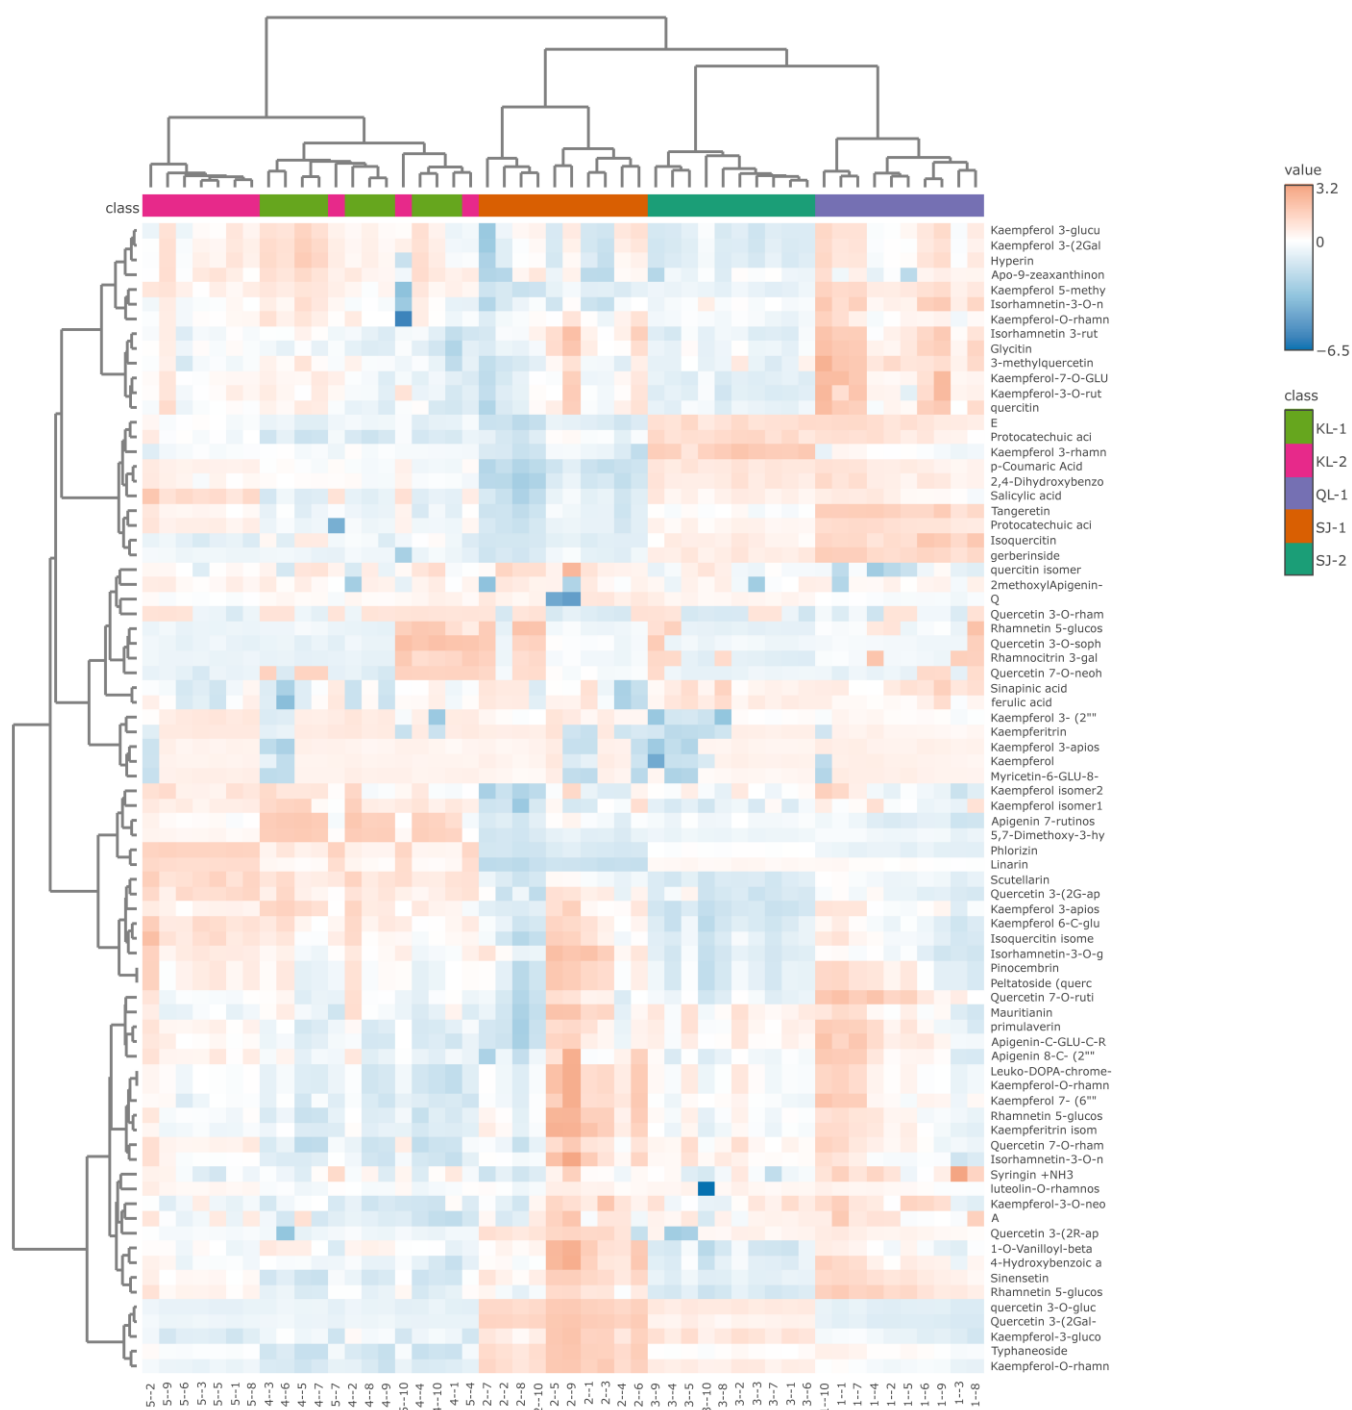

**Fig S3** Heatmaps based on top 25 phenolic acids in different varieties of quinoa. Colors represent different concentrations indicated by the color bar.

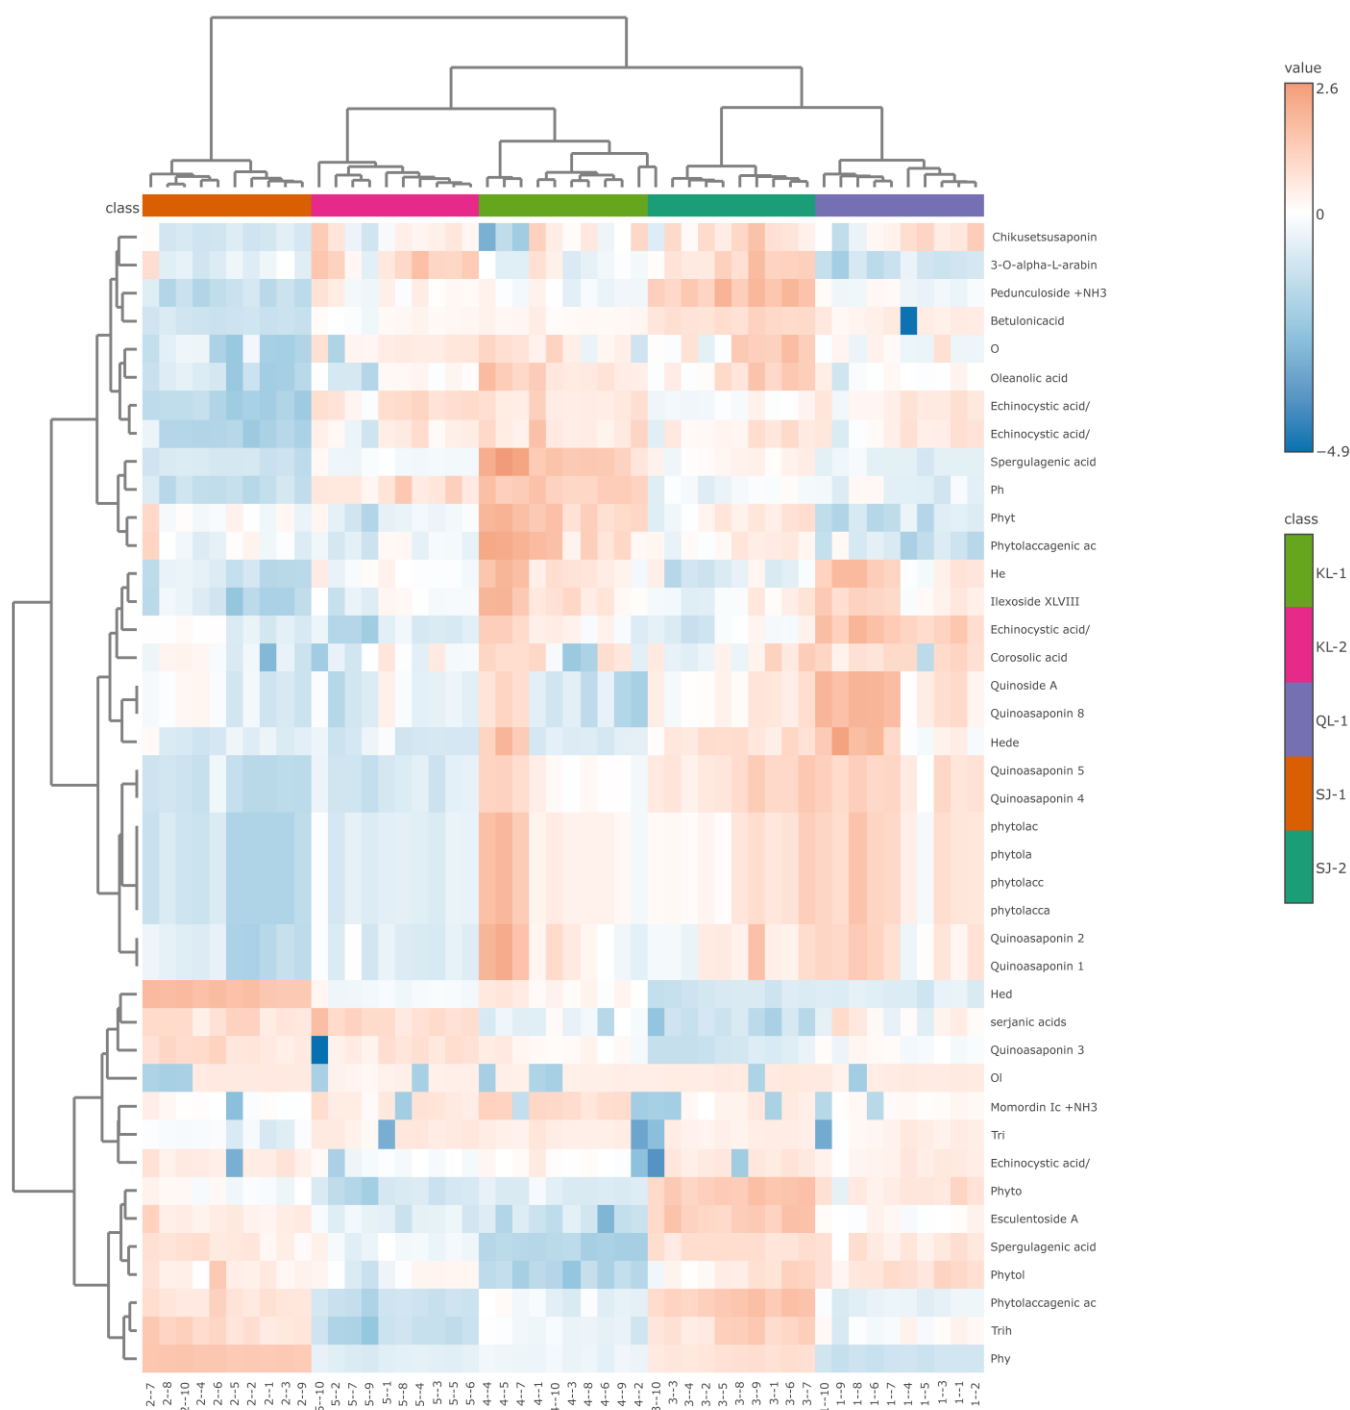

**Fig S4** Heatmaps based on top 25 saponins in different varieties of quinoa. Colors represent different concentrations indicated by the color bar.

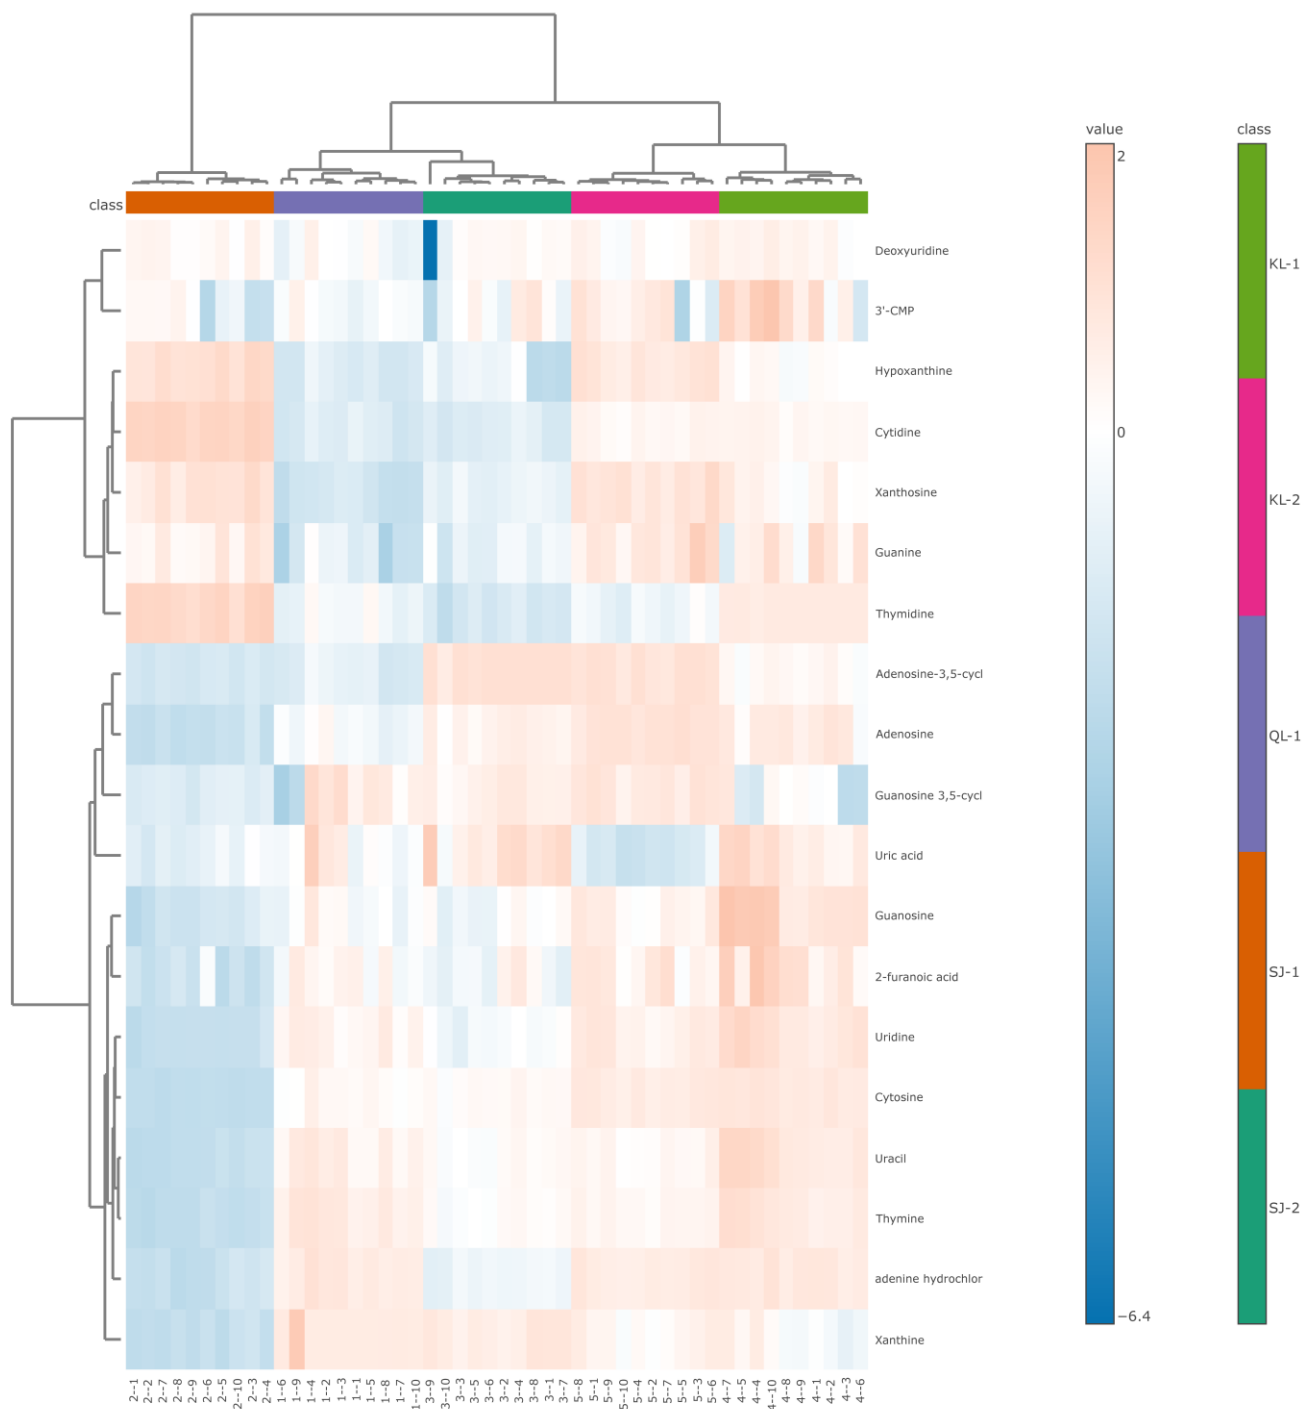

**Fig S5** Heatmaps based on top 25 nucleosides in different varieties of quinoa. Colors represent different concentrations indicated by the color bar.

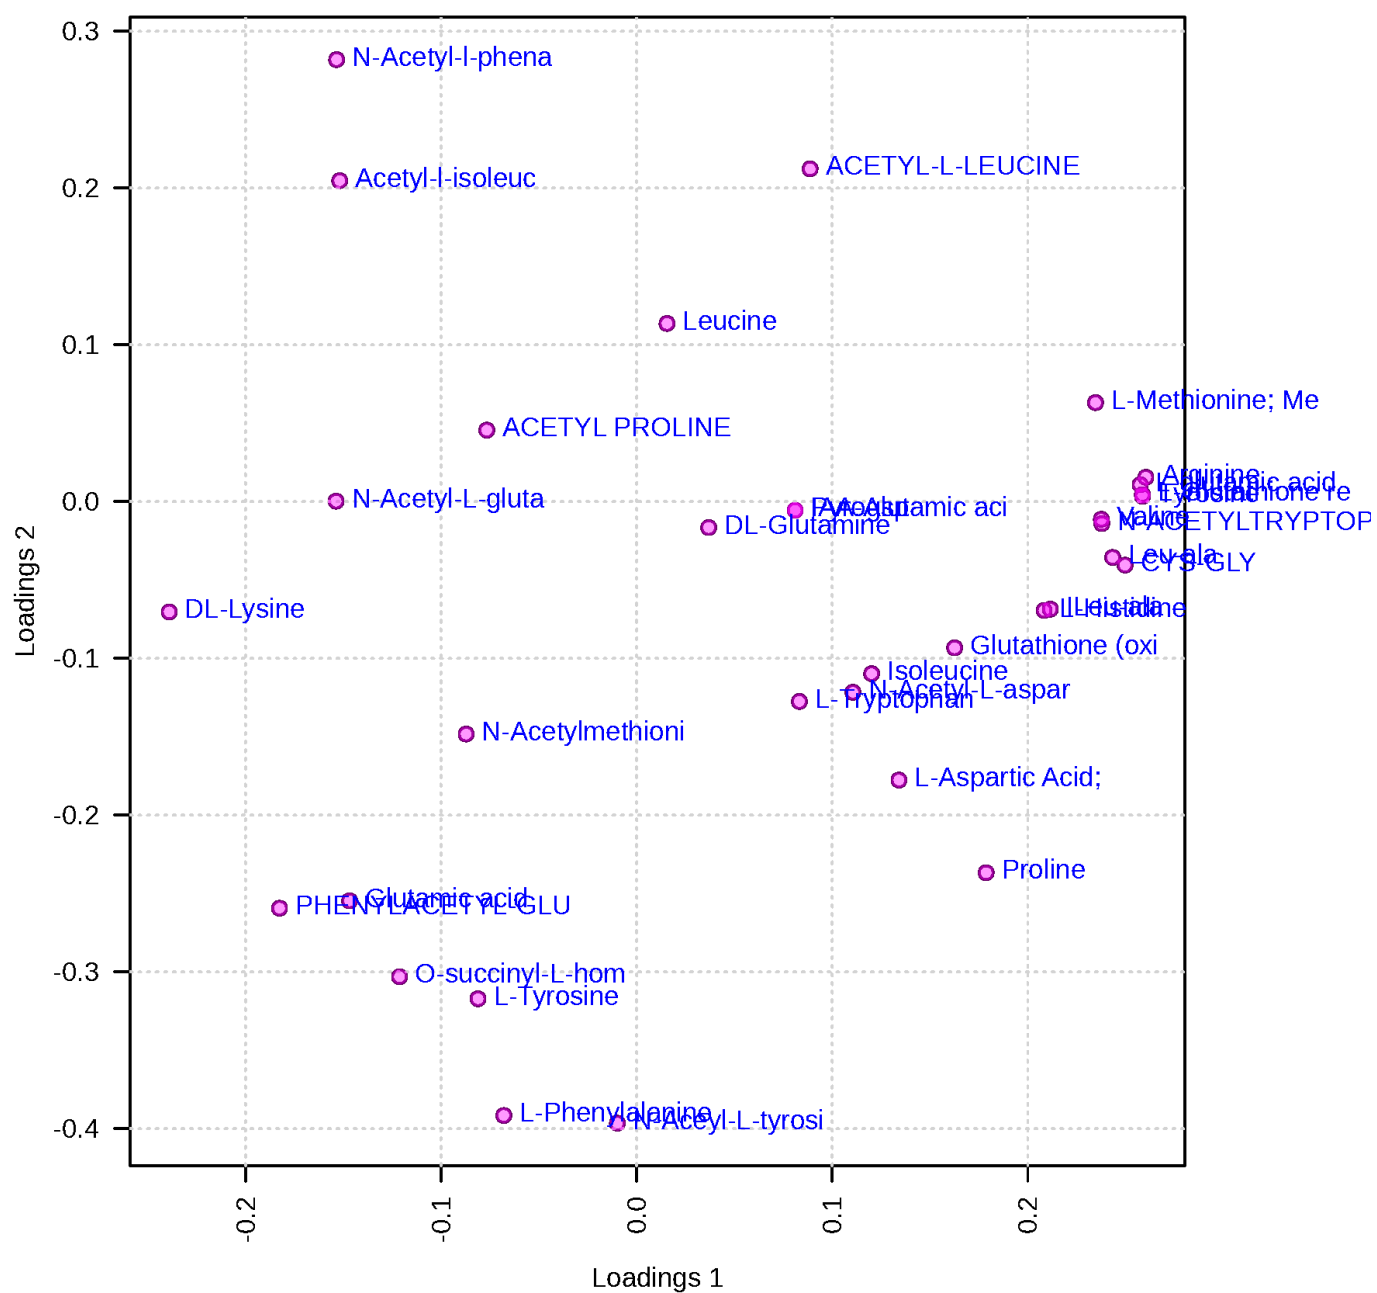

Fig S6 Loading plots of amino acids/peptides in different varieties of quinoa.

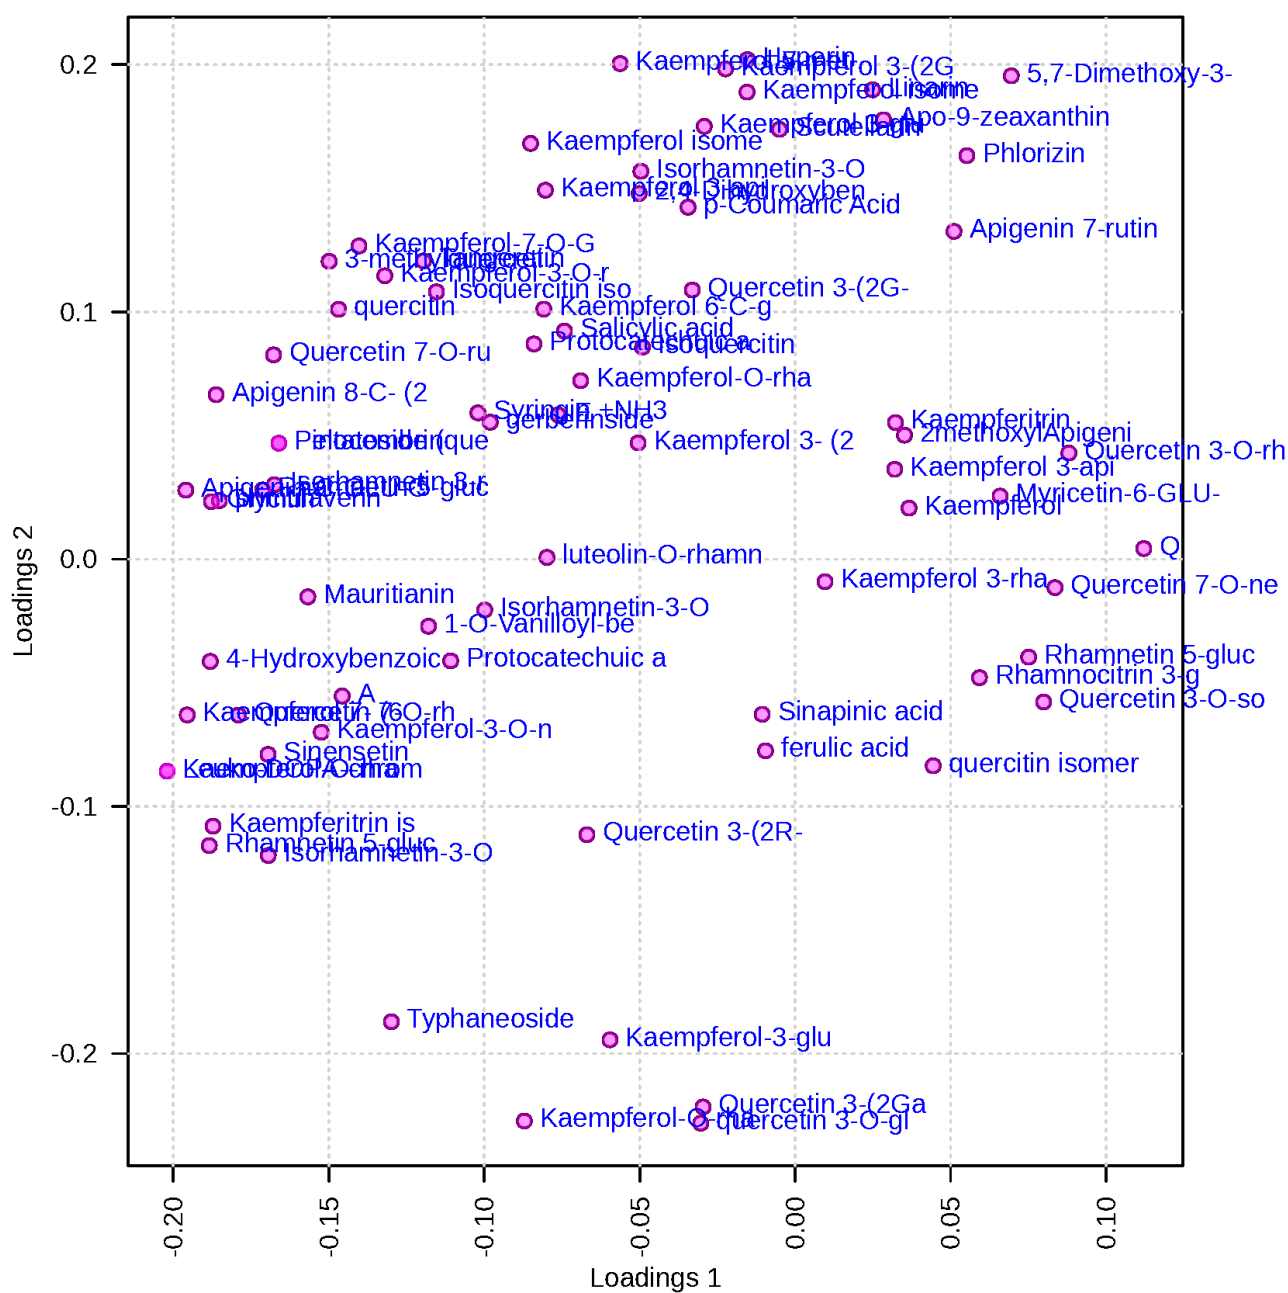

Fig S7 Loading plots of phenolic acids in different varieties of quinoa.



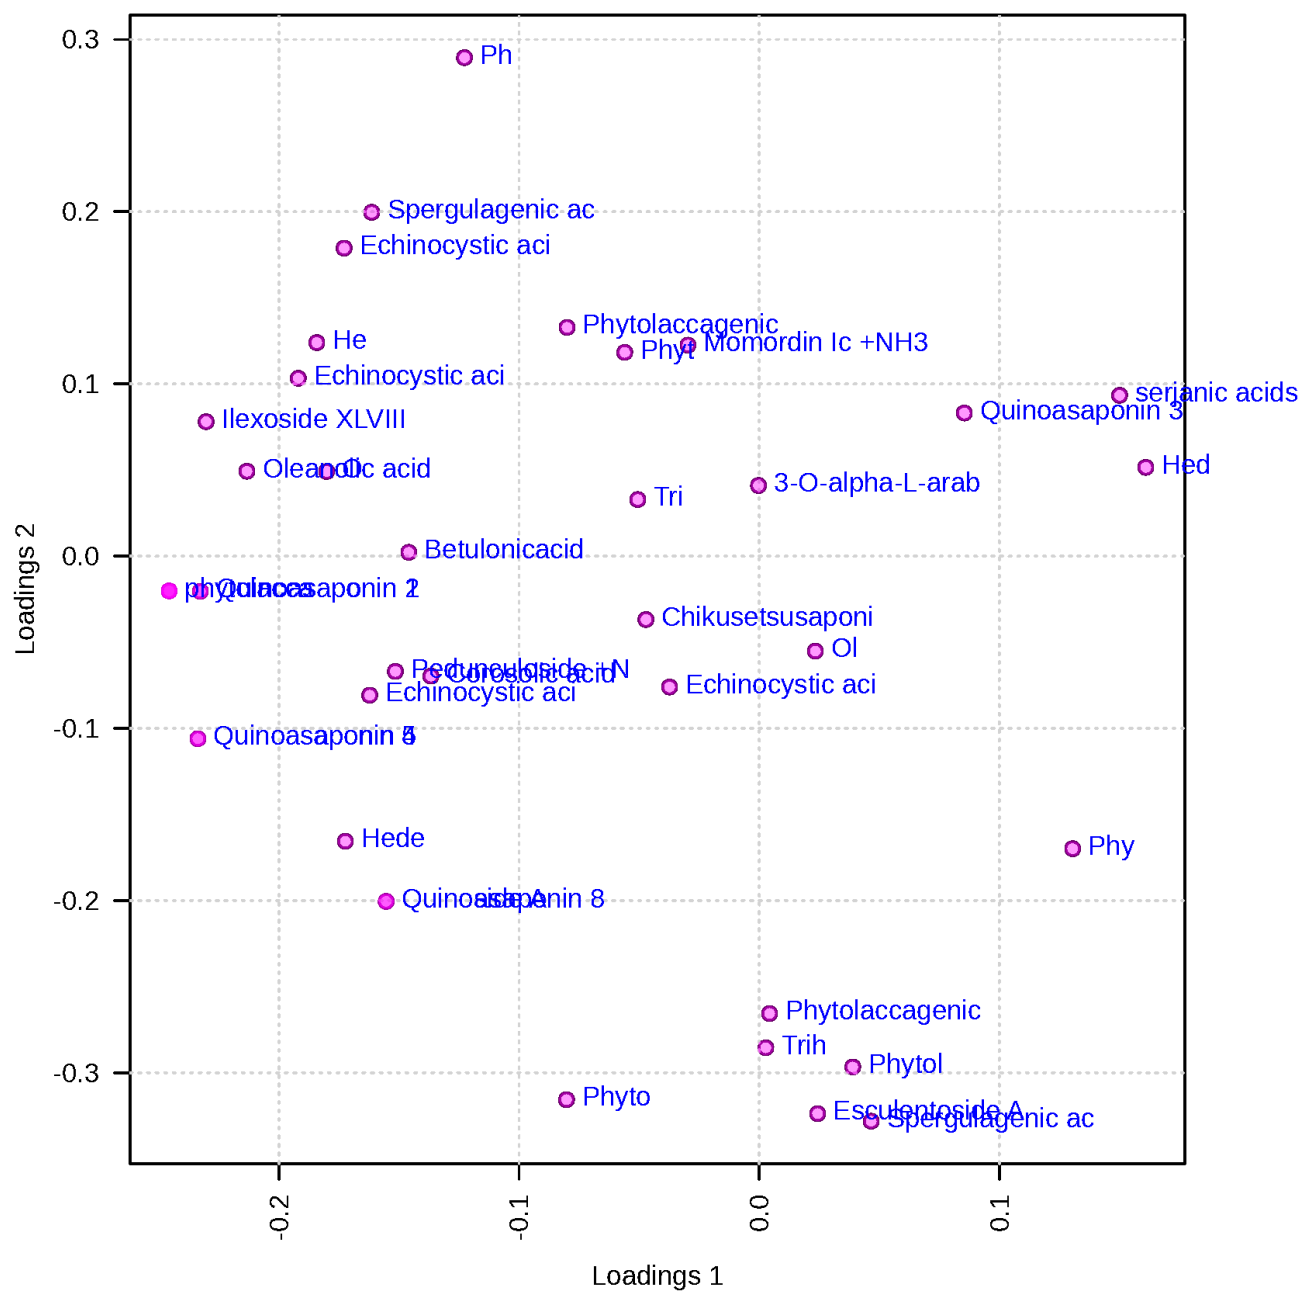

**Fig S8** Loading plots of saponins in different varieties of quinoa.

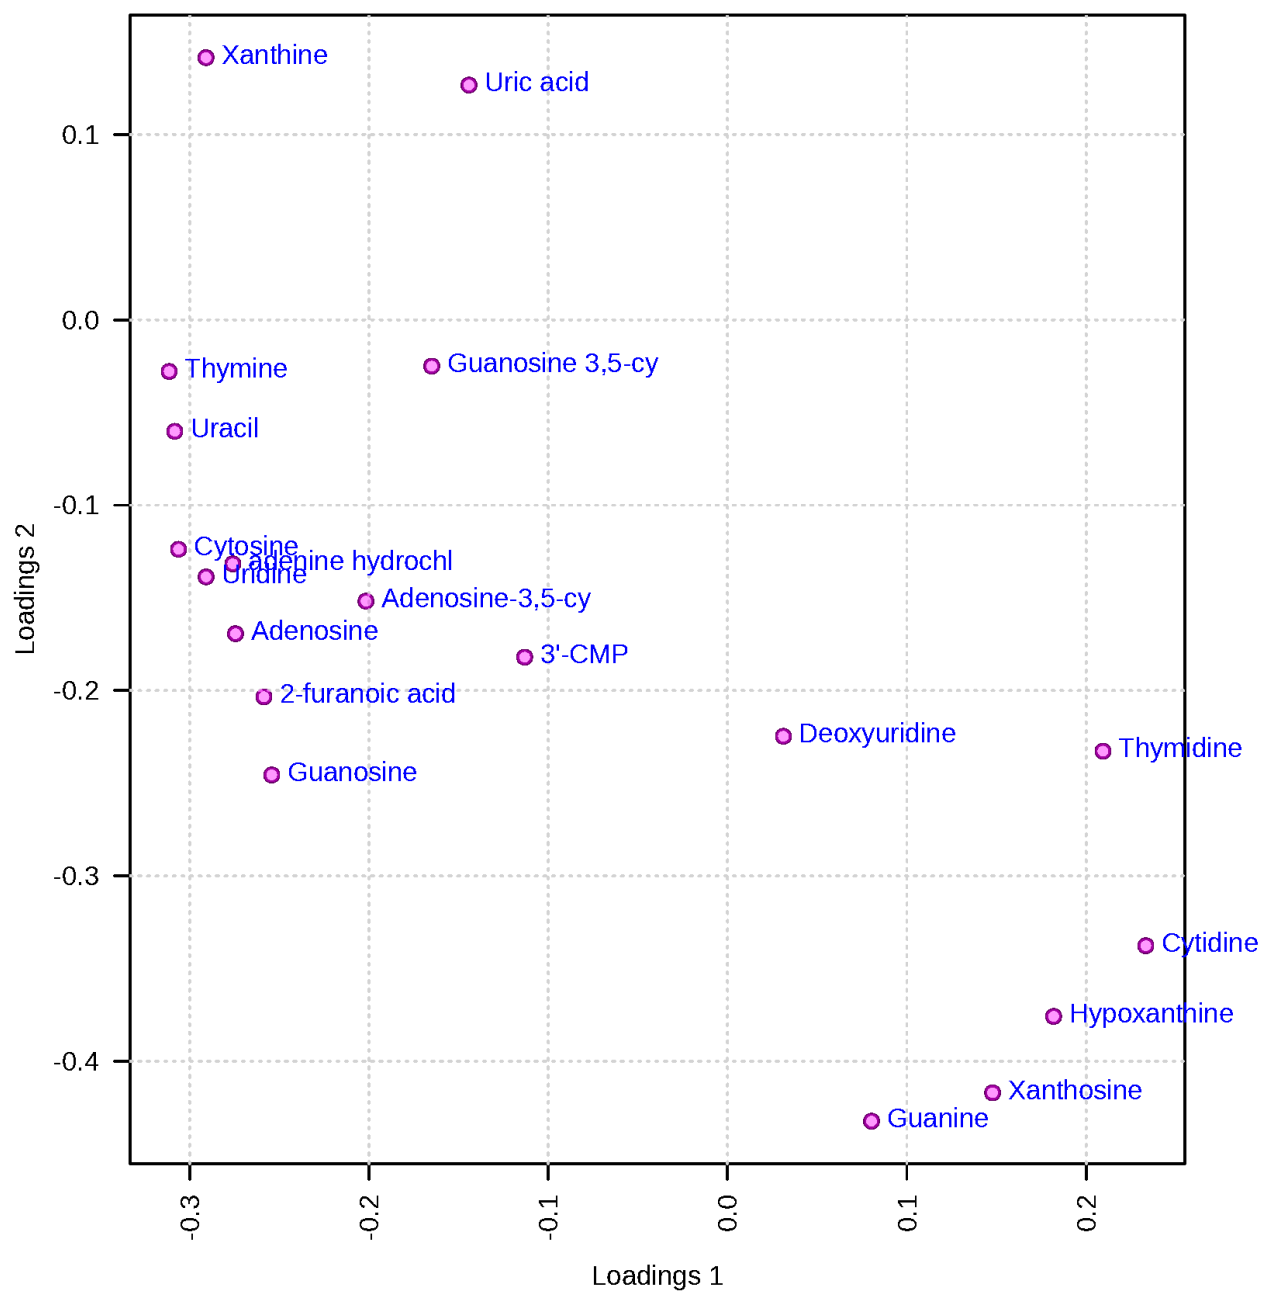

**Fig S9** Loading plots of amino nucleosides in different varieties of quinoa.

**Tab S1** Types of metabolites detected in different varieties of quinoa.

| Metabolite type                                                                                                                                                                                                                                                                                                                                                                                                                 | Metabolites                                                                                                                                                                                                                                                                                                                                                                                                                                                                                                                                                                                                               |
|---------------------------------------------------------------------------------------------------------------------------------------------------------------------------------------------------------------------------------------------------------------------------------------------------------------------------------------------------------------------------------------------------------------------------------|---------------------------------------------------------------------------------------------------------------------------------------------------------------------------------------------------------------------------------------------------------------------------------------------------------------------------------------------------------------------------------------------------------------------------------------------------------------------------------------------------------------------------------------------------------------------------------------------------------------------------|
| <div><p><b>Copyright:</b> © 2024 by the authors. Licensee MDPI, Basel, Switzerland. This article is an open access article distributed under the terms and conditions of the Creative Commons Attribution (CC BY) license (<a href="https://creativecommons.org/licenses/by/4.0/">https://creativecommons.org/licenses/by/4.0/</a>).</p></div> |                                                                                                                                                                                                                                                                                                                                                                                                                                                                                                                                                                                                                           |
| Amino acid/peptide                                                                                                                                                                                                                                                                                                                                                                                                              | ACETYL PROLINE<br>Acetyl-l-isoleucine<br>ACETYL-L-LEUCINE<br>CYS-GLY<br>DL-Glutamine<br>DL-Lysine<br>Glutamic acid<br>Glutathione (oxidized)<br>IAA-Asp<br>lLeu-ala<br>Isoleucine<br>L-Aspartic Acid; Asp<br>Leu-ala<br>Leucine<br>L-Glutathione reduced<br>L-Histidine<br>L-Methionine; Met H -H<br>L-Phenylalanine<br>L-Tryptophan<br>L-Tyrosine<br>N-Acetyl-L-aspartic acid<br>N-Acetyl-L-glutamate<br>N-Acetyl-l-phenalanine<br>N-Acetylmethionine<br>N-ACETYLTRYPTOPHAN<br>N-Aceyl-L-tyrosine<br>O-succinyl-L-homoserine<br>PHENYLACETYL-GLUTAMINE<br>Proline<br>Pyroglutamic acid<br>Tyrosine<br>Valine<br>Arginine |

|               |                                                                                                                                                                                                                                                                                                                                                                                                                                                                      |
|---------------|----------------------------------------------------------------------------------------------------------------------------------------------------------------------------------------------------------------------------------------------------------------------------------------------------------------------------------------------------------------------------------------------------------------------------------------------------------------------|
|               | L-glutamic acid                                                                                                                                                                                                                                                                                                                                                                                                                                                      |
| Sesquiterpene | Curdione<br>Patchouli alcohol (loss H <sub>2</sub> O)                                                                                                                                                                                                                                                                                                                                                                                                                |
| Nucleoside    | 2-furanoic acid<br>3'-CMP<br>adenine hydrochloride<br>Adenosine<br>Adenosine-3,5-cyclic phosphate cAMP<br>Cytidine<br>Cytosine<br>Deoxyuridine<br>Guanine<br>Guanosine<br>Guanosine 3,5-cyclic monophosphate<br>Hypoxanthine<br>Thymidine<br>Thymine<br>Uracil<br>Uric acid<br>Uridine<br>Xanthine<br>Xanthosine                                                                                                                                                     |
| Phenolics     | 2,4-Dihydroxybenzoic acid<br>4-Hydroxybenzoic acid<br>ferulic acid<br>p-Coumaric Acid<br>Protocatechuic acid<br>Protocatechuic acid-3-glucoside<br>Salicylic acid<br>Sinapinic acid<br>1-O-Vanilloyl-beta-D-glucose<br>E<br>2methoxylApigenin-O-GLU-O-Rha<br>3-methylquercetin<br>A<br>5,7-Dimethoxy-3-hydroxyflavone<br>Apigenin 7-rutinoside<br>Apigenin 8-C- (2",3"-diacetylglucoside)<br>Apigenin-C-GLU-C-Rha<br>Apo-9-zeaxanthinone<br>gerberinside<br>Glycitin |

|  |                                                                                        |
|--|----------------------------------------------------------------------------------------|
|  | Hyperin                                                                                |
|  | Isoquercitin                                                                           |
|  | Isoquercitin isomer                                                                    |
|  | Isorhamnetin 3-rutinoside                                                              |
|  | (Narcissoside)                                                                         |
|  | Isorhamnetin-3-O-glucoside                                                             |
|  | Isorhamnetin-3-O-neohespeidoside                                                       |
|  | Isorhamnetin-3-O-neohespeidoside isomer                                                |
|  | Kaempferitrin                                                                          |
|  | Kaempferitrin isomer                                                                   |
|  | Kaempferol                                                                             |
|  | Kaempferol 3- (2"- (E) -p-coumaroyl-<br>alpha-L-arabinofuranoside) -8-C-<br>rhamnoside |
|  | Kaempferol 3-(2Gal-<br>apiosylrobinobioside)                                           |
|  | Kaempferol 3-apiosyl-(1->2)-<br>galactoside                                            |
|  | Kaempferol 3-apiosyl-(1->4)-<br>rhamnoside-7-rhamnoside                                |
|  | Kaempferol 3-glucuronide                                                               |
|  | Kaempferol 3-rhamnoside-7-xyloside                                                     |
|  | Kaempferol 5-methyl ether                                                              |
|  | Kaempferol 6-C-glucoside-8-C-<br>rhamnoside                                            |
|  | Kaempferol 7- (6"-p-succinylglucoside)                                                 |
|  | Kaempferol isomer1                                                                     |
|  | Kaempferol isomer2                                                                     |
|  | Kaempferol-3-glucoside (Astragalin)                                                    |
|  | Kaempferol-3-O-neohespeidoside                                                         |
|  | Kaempferol-3-O-rutinoside                                                              |
|  | Kaempferol-7-O-GLU                                                                     |
|  | Kaempferol-O-rhamnoside isomer1                                                        |
|  | Kaempferol-O-rhamnoside isomer2                                                        |
|  | Kaempferol-O-rhamnoside isomer3                                                        |
|  | Leuko-DOPA-chrome-glucoside                                                            |
|  | Linarin                                                                                |
|  | luteolin-O-rhamnoside-GLU                                                              |
|  | Mauritianin                                                                            |
|  | Myricetin-6-GLU-8-Xyl                                                                  |

|          |                                                                                                                                                                                                                                                                                                                                                                                                                                                                                                                                                                                                                                                                                                                                                                                             |
|----------|---------------------------------------------------------------------------------------------------------------------------------------------------------------------------------------------------------------------------------------------------------------------------------------------------------------------------------------------------------------------------------------------------------------------------------------------------------------------------------------------------------------------------------------------------------------------------------------------------------------------------------------------------------------------------------------------------------------------------------------------------------------------------------------------|
|          | <p>Peltatoside (quercetin-3-arabinoglucoside)</p> <p>Phlorizin</p> <p>Pinocembrin</p> <p>primulaverin</p> <p>Quercetin 3-(2Gal-rhamnosyl-robinobioside)</p> <p>Quercetin 3-(2G-apiosylrutinoside)</p> <p>Quercetin 3-(2R-apiosylrutinoside)</p> <p>quercetin 3-O-glucuronide</p> <p>Quercetin 3-O-rhamnosyl-(1-&gt;6)-galactoside</p> <p>Quercetin 3-O-sophoroside</p> <p>Quercetin 7-O-neohespeidoside</p> <p>Quercetin 7-O-rhamnosyl-(1-&gt;6)-galactoside</p> <p>Quercetin 7-O-rutinoside</p> <p>Q</p> <p>quercitin</p> <p>quercitin isomer</p> <p>Rhamnetin 5-glucoside</p> <p>Rhamnetin 5-glucoside isomer1</p> <p>Rhamnetin 5-glucoside isomer2</p> <p>Rhamnocitrin 3-galactoside</p> <p>Scutellarin</p> <p>Sinensetin</p> <p>Syringin +NH3</p> <p>Tangeretin</p> <p>Typhaneoside</p> |
| hormone  | <p>Corticosterone</p> <p>ecdysterone</p> <p>Indole</p> <p>Norethisterone acetate</p>                                                                                                                                                                                                                                                                                                                                                                                                                                                                                                                                                                                                                                                                                                        |
| pigment  | <p>4,5-seco-DOPA</p> <p>Amaranthin</p> <p>Betanin</p> <p>DOPA-betaxanthin</p>                                                                                                                                                                                                                                                                                                                                                                                                                                                                                                                                                                                                                                                                                                               |
| alkaloid | <p>N-trans-Feruloyl tyramine</p> <p>Sinapine</p> <p>Trigonelline</p>                                                                                                                                                                                                                                                                                                                                                                                                                                                                                                                                                                                                                                                                                                                        |
| sugar    | <p>D-Glucose</p> <p>D-Sucrose</p>                                                                                                                                                                                                                                                                                                                                                                                                                                                                                                                                                                                                                                                                                                                                                           |

|              |                                                                                                                                                                                                                                                                                                                                                                                                                                                                                         |
|--------------|-----------------------------------------------------------------------------------------------------------------------------------------------------------------------------------------------------------------------------------------------------------------------------------------------------------------------------------------------------------------------------------------------------------------------------------------------------------------------------------------|
|              | nystose<br>RAFFINOSE<br>Sibiricose A1<br>Sibiricose A5<br>Stachyose<br>D-Glucose 1-phosphate<br>Fungitetraose<br>Po<br>Pom                                                                                                                                                                                                                                                                                                                                                              |
| vitamin      | 4-Pyridoxic Acid<br>Nicotinic acid<br>Vitamin B2<br>Vitamin B4<br>Vitamin B5                                                                                                                                                                                                                                                                                                                                                                                                            |
| coumarin     | 6-Methylcoumarin<br>Cinnamaldehyde<br>Coumarin<br>Scoparone<br>2-Aminoadipic acid<br>2-ISOPROPYLMALIC ACID<br>3-(4-Hydroxyphenyl)lactate<br>anthranilic acid<br>CITRIC ACID<br>DL-3-Aminoisobutyric acid<br>DL-Malic acid -H<br>glutaconic acid<br>hexadecylitaconic acid<br>Hexaric acid<br>L-Threonic acid<br>methylene succinic acid<br>Pantothenic Acid<br>Pipecolic acid<br>Pipicolinic acid<br>Succinic acid<br>trans-3-indole-acrylic acid<br>Vanillic acid<br>Glycyrrhetic acid |
| organic acid |                                                                                                                                                                                                                                                                                                                                                                                                                                                                                         |
| saponin      | 3-O-alpha-L-arabinopyranosylserjanic<br>acid 28-O-beta-D-glucopyranosyl ester<br>3β,23,30 trihydroxy olean-12-en-28-oic<br>acid                                                                                                                                                                                                                                                                                                                                                         |

---

3 $\beta$ ,23,30 trihydroxy olean-12-en-28-oic  
acid isomer  
Betulonicacid  
Chikusetsusaponin IVa  
Corosolic acid  
Echinocystic  
acid/Hederagenin/Queretaroic acid 1  
Echinocystic  
acid/Hederagenin/Queretaroic acid 2  
Echinocystic  
acid/Hederagenin/Queretaroic acid 3  
Echinocystic  
acid/Hederagenin/Queretaroic acid 4  
Esculentoside A  
Ilexoside XLVIII  
Momordin Ic +NH<sub>3</sub>  
Oleanolic acid  
oleanolic acid 3-O-[ $\alpha$ -L-  
arabinopyranosyl-(1-3)- $\beta$ -D-  
glucopyranosyl]-28-O- $\beta$ -D-  
glucopyranoside  
oleanolic acid 3-O- $\beta$ -D-glucopyranosyl-  
28-O- $\beta$ -D-glucopyranoside  
Pedunculoside +NH<sub>3</sub>  
Phytolaccagenic acid  
phytolaccagenic acid 3-O- [ $\alpha$ -L-  
arabinopyranosyl-(1-3)- $\beta$ -D-  
glucuronopyranosyl]- 28-O- $\beta$ -D-  
glucopyranoside  
phytolaccagenic acid 3-O- [ $\alpha$ -L-  
arabinopyranosyl-(1-3)- $\beta$ -D-  
glucuronopyranosyl]- 28-O- $\beta$ -D-  
glucopyranoside isomer  
phytolaccagenic acid 3-O-[ $\beta$ -D-  
glucopyranosyl-(1-4)- $\beta$ -D-  
glucopyranosyl-(1-4)- $\beta$ -D-  
glucopyranosyl]-28-O- $\beta$ -D-  
glucopyranoside  
phytolaccagenic acid 3-O-[ $\beta$ -D-  
glucopyranosyl-(1-4)- $\beta$ -D-  
glucopyranosyl]-28-O- $\beta$ -D-  
glucopyranoside

---



phytolaccagenic acid 3-O-[ $\beta$ -D-glucopyranosyl-(1-4)- $\beta$ -D-glucopyranosyl]-28-O- $\beta$ -D-glucopyranoside isomer

Phytolaccagenic acid isomer

phytolaccagenic acid-3-O- $\beta$ -D-glucopyranosyl-28-O- $\beta$ -D-glucopyranoside

phytolaccagenic acid-3-O- $\beta$ -D-glucopyranosyl-28-O- $\beta$ -D-glucopyranoside isomer1

phytolaccagenic acid-3-O- $\beta$ -D-glucopyranosyl-28-O- $\beta$ -D-glucopyranoside isomer2

phytolaccagenic acid-3-O- $\beta$ -D-glucopyranosyl-28-O- $\beta$ -D-glucopyranoside isomer3

Quinoasaponin 1

Quinoasaponin 2

Quinoasaponin 3

Quinoasaponin 4

Quinoasaponin 5

Quinoasaponin 8

Quinoside A

serjanic acids

spergulagenic acid 3-O-[ $\alpha$ -L-arabinopyranosyl-(1-3)- $\beta$ -D-glucuronopyranosyl]-28-O- $\beta$ -D-glucopyranoside

hedeagenin 3-O-[ $\alpha$ -L-arabinopyranosyl-(1-3)- $\beta$ -D-glucuronopyranosyl]-28-O- $\beta$ -D-glucopyranoside

hedeagenin 3-O-[ $\alpha$ -L-arabinopyranosyl-(1-3)- $\beta$ -D-glucuronopyranosyl]-28-O- $\beta$ -D-glucopyranoside isomer1

hedeagenin 3-O-[ $\alpha$ -L-arabinopyranosyl-(1-3)- $\beta$ -D-glucuronopyranosyl]-28-O- $\beta$ -D-glucopyranoside isomer2

|       |                                                                                                                                                                                                                                                                                                                                                                                                                                                                                                                                                                                                                                                                                                                                                                            |
|-------|----------------------------------------------------------------------------------------------------------------------------------------------------------------------------------------------------------------------------------------------------------------------------------------------------------------------------------------------------------------------------------------------------------------------------------------------------------------------------------------------------------------------------------------------------------------------------------------------------------------------------------------------------------------------------------------------------------------------------------------------------------------------------|
|       | spergulagenic acid 3-O-[ $\beta$ -D-glucopyranosyl-(1-2)- $\beta$ -D-glucopyranosyl-(1-3)- $\alpha$ -L-arabinopyranosyl]-28-O- $\beta$ -D-glucopyranoside                                                                                                                                                                                                                                                                                                                                                                                                                                                                                                                                                                                                                  |
| other | (Z)-3-[4-methoxy-2-[(2S,3R,4S,5S,6R)-3,4,5-trihydroxy-6-(hydroxymethyl)oxan-2-yl]oxyphenyl]prop-2-enoic acid<br>13-Docosenamide<br>13-Oxo-9,11-tridecadienoic acid<br>1-amino-naphthalene<br>1-O-Vanilloyl-beta-D-Galactose<br>2,3-dihydro-3,5-dihydroxy-6-methyl-4H-pyran-4-one<br>3-hydroxytyramine hydrochloride<br>4-hydroxy-6-methyl-2-pyron<br>7-hydroxy-4-methyl-chromen-2-one<br>9-(2,3-dihydroxypropoxy)-9-oxononanoic acid<br>Acetophenone<br>C18:2-glycer-Glu<br>Choline<br>ethyl 6-(4-hydroxyphenyl)-4-methyl-2-oxo-1,3,6-trihydropyrimidine-5-carboxylat e<br>Gingerglycolipid B<br>Levodopa<br>Methyl linoleate<br>N-trans-Isoferuloyl-3-O-methyldopamine<br>Phosphocholine<br>pinellic acid<br>piperidine<br>Momordin IIc<br>Sambucinol H -H<br>Methoxsalen |

---

**Disclaimer/Publisher's Note:** The statements, opinions and data contained in all publications are solely those of the individual author(s) and contributor(s) and not of MDPI and/or the editor(s). MDPI and/or the editor(s) disclaim responsibility for any injury to people or property resulting from any ideas, methods, instructions or products referred to in the content.
